# Supplementary material
Source: PubMed Central journal article supplement (PMC3069134)
Supplement: NIHMS279133-supplement-1_si_001.pdf [file NIHMS279133-supplement-1_si_001.pdf]

## Supporting Info

# **Electrochemical Measurement of Endogenous Serotonin Release from Human Blood Platelets**

Shencheng Ge,<sup>1</sup> Emily Woo,<sup>1</sup> James G. White<sup>2</sup> and Christy L. Haynes<sup>1</sup>

<sup>1</sup> Department of Chemistry, College of Science and Engineering, University of Minnesota, Minneapolis, Minnesota 55455

<sup>2</sup> Department of Laboratory Medicine, Pathology and Pediatrics, School of Medicine, University of Minnesota, Minneapolis, Minnesota 55455

### **Corresponding author:**

Christy L. Haynes

Department of Chemistry  
University of Minnesota  
207 Pleasant Street SE  
Minneapolis, MN 55455

Tel: (612) 626-1096

Email: [chaynes@umn.edu](mailto:chaynes@umn.edu)

### **Supporting Materials included:**

Figure S-1.  $\text{Ca}^{2+}$ -dependence of thrombin-stimulated serotonin release from human platelets

Figure S-2. Serotonin release from concentrated HPS platelets

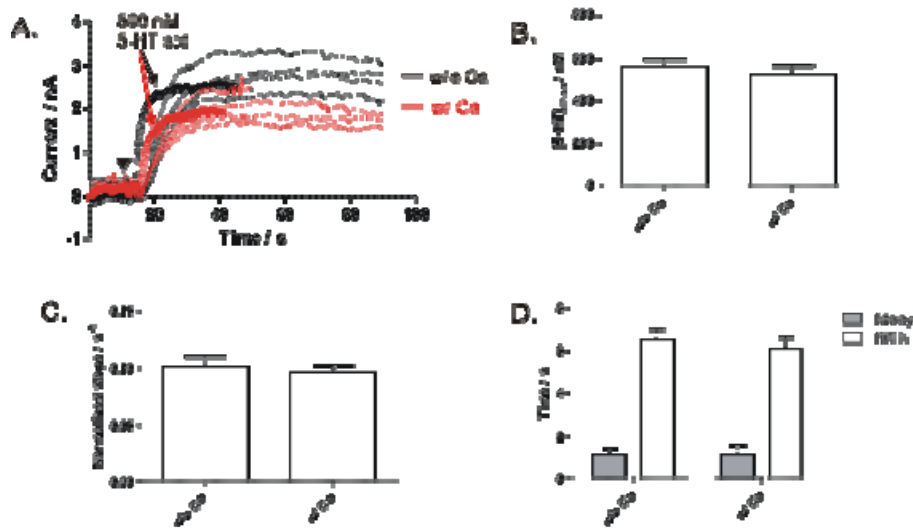

**Figure S-1. Ca<sup>2+</sup>-dependence of thrombin-stimulated serotonin release from human platelets (A)** Serotonin release was measured from platelets stimulated with thrombin (4 U/mL, symbol ▼) in the presence or absence of 2.0 mM Ca<sup>2+</sup>. Ca<sup>2+</sup> was added to Ca<sup>2+</sup>-free platelet suspension ~1 min prior to thrombin stimulation. The post-calibration of the electrode is also shown by the open symbols. The electrode response to serotonin was slightly suppressed in the presence of di-cations, a known behavior of carbon-fiber microelectrodes.<sup>1</sup> (B-D) The amount and time course of thrombin-stimulated serotonin release were not altered by the extracellular Ca<sup>2+</sup>. Experiments were performed at 37 ± 1 °C. N=4 and p>0.05 using unpaired Student's t-test.

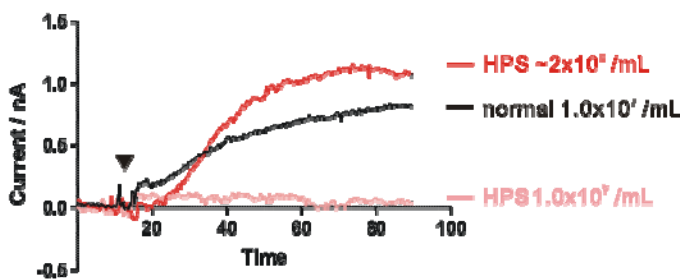

**SI Figure S-2. Serotonin release from concentrated HPS platelets** Measurements of serotonin release from diluted normal and HPS platelets show robust response and no detectable signal, respectively; however, detectable serotonin release could be measured from highly concentrated HPS platelet suspension in two out of four HPS platelet samples that were tested. This experiment was performed at room temperature.

## Reference

- 1 Chen, B. T.; Rice, M. E. *Electroanalysis*. **1999**, *11*, 344-348
